# Supplementary material for: Unusual selectivity of a (pincer)Ni-hydride reacting with CO2
Source: Royal Society of Chemistry journal article supplement (doi:10.1039/b822677f), 2009-01-01
Supplement: b822677f.pdf [file b822677f.pdf]

## Supporting Information

### Unusual Selectivity of a (pincer)Ni-hydride Reacting with CO<sub>2</sub>

Matthew F. Laird, Maren Pink, Nikolay P. Tsvetkov, Hongjun Fan and Kenneth G.

Caulton\*

Department of Chemistry, Indiana University, Bloomington, Indiana, USA

#### Computational Details

All calculations were carried out using Density Functional Theory as implemented in the Jaguar 6.0 suite<sup>1</sup> of ab initio quantum chemistry programs. Geometry optimizations were performed with the B3LYP<sup>2-5</sup> functional and the 6-31G\*\* basis set with no symmetry restrictions. Transition metals were represented using the Los Alamos LACVP basis<sup>6,7</sup>. The energies of the optimized structures were reevaluated by additional single-point calculations on each optimized geometry using Dunning's correlation-consistent triple- $\zeta$  basis set<sup>8</sup> cc-pVTZ(-f) that includes a double set of polarization functions. For all transition metals, we used a modified version of LACVP, designated as LACV3P, in which the exponents were decontracted to match the effective core potential with the triple- $\zeta$  quality basis.

The models used in this study consist of up to ~80 atoms, which represent the non-truncated substrates that were also used in the related experimental work.

#### References

1. Jaguar, version 6.0, *Schrödinger, L.L.C, New York, NY, 2005*.
2. Becke, A. D., *Phys. Rev. A* **1988**, *38*, 3098.
3. Becke, A. D., *J. Chem. Phys.* **1993**, *98*, 5648.
4. Lee, C. T.; Yang, W. T.; Parr, R. G., *1988 Phys. Rev. B*, *37*, 785.
5. Vosko, S. H.; Wilk, L.; Nusair, M., *Can. J. Phys.* **1980**, *58*, 1200.
6. Hay, P. J.; Wadt, W. R., *J. Chem. Phys.* **1985**, *82*, 270.
7. Wadt, W. R.; Hay, P. J., *J. Chem. Phys.* **1985**, *82*, 284.
8. Dunning, T. H., *J. Chem. Phys.* **1989**, *90*, 1007.

S1. (POP)Ni(NCO).

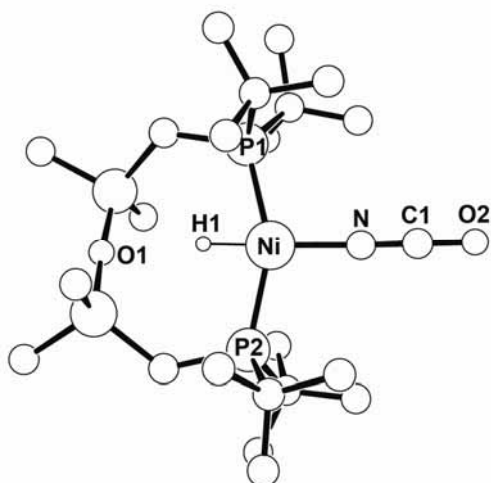

**3** (0.0 kcal/mol)

Select bond lengths (Å) and bond angles (°).

|          |       |
|----------|-------|
| Ni-P1    | 2.269 |
| Ni-P2    | 2.270 |
| Ni-H1    | 1.426 |
| Ni-N     | 1.921 |
| Ni-O1    | 3.759 |
| P1-Ni-P2 | 154.2 |
| N-Ni-H1  | 173.8 |
| Ni-N-C1  | 174.1 |
| O1-Ni-H1 | 17.4  |

S2. (PNP)Ni(OCOH).

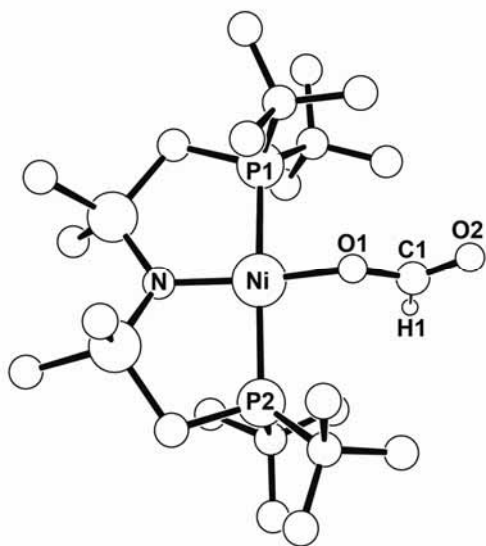

2 (+19.1 kcal/mol)

Select bond lengths (Å) and bond angles (°).

|          |       |
|----------|-------|
| Ni-P1    | 2.357 |
| Ni-P2    | 2.346 |
| Ni-N     | 1.941 |
| Ni-O1    | 1.888 |
| P1-Ni-P2 | 170.5 |
| N-Ni-O1  | 163.8 |
| Ni-O1-C1 | 135.2 |

S3. (PNP)Ni(COOH)

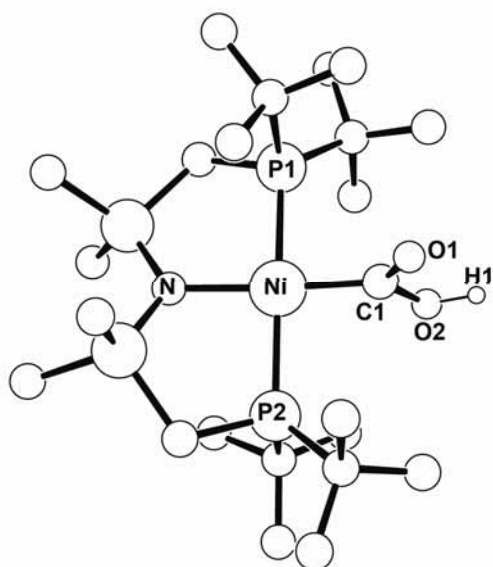

**1** (+21.4 kcal/mol)

Select bond lengths (Å) and bond angles (°).

|          |       |
|----------|-------|
| Ni-P1    | 2.331 |
| Ni-P2    | 2.336 |
| Ni-N     | 1.994 |
| Ni-C1    | 1.886 |
| P1-Ni-P2 | 173.3 |
| N-Ni-O1  | 171.4 |
| Ni-C1-O1 | 123.9 |
| Ni-C1-O2 | 118.6 |

#### 4. Optimized Structures.

3

```
Ni 15.790938795 2.170573748 18.127257070
P 16.638535451 0.389696659 19.250537633
P 14.429642996 3.968444980 17.876062777
Si 15.380343730 1.673618062 22.089661147
Si 12.749787247 3.031226454 20.642421956
O 14.003386577 2.302567552 21.430834793
C 16.575487275 3.088513471 22.433815394
H 16.071436462 3.826957189 23.068883161
H 16.892447961 3.594134089 21.518062004
H 17.473304666 2.757976765 22.967206586
C 14.907455278 0.869611320 23.731445884
H 14.471384809 1.608794904 24.412932703
H 15.777813159 0.430757588 24.233319516
H 14.167749120 0.073341731 23.591881634
C 16.017596619 0.232941261 21.008492630
H 16.726645741 -0.360203580 21.601229364
H 15.119381461 -0.394865237 20.938684333
C 16.010318348 -1.264506380 18.480237421
C 18.550367268 0.400802584 19.418968542
C 11.778613691 4.043977870 21.907063572
H 12.398080226 4.825071087 22.362274256
H 11.412135980 3.400909707 22.715184399
H 10.908371557 4.533180329 21.453567520
C 11.637842696 1.664233538 19.978371121
H 12.144554553 1.037644088 19.239237607
H 10.717680667 2.046813426 19.524100663
H 11.347112070 1.022203662 20.818248502
C 13.394090356 4.325052468 19.391040723
H 12.552143955 4.977328897 19.123475543
H 14.040076867 4.941641434 20.030881057
C 15.535911071 5.536430272 17.743084164
C 14.826360126 6.868436333 18.058467503
H 15.562339051 7.681076112 18.011625035
H 14.394168552 6.884258736 19.063363790
H 14.034255819 7.106349473 17.346807934
C 13.136809867 3.915952972 16.455378907
C 16.115378176 -2.490149445 19.410181338
C 16.737934217 -1.568757918 17.157269099
C 14.518320794 -1.017782206 18.157024999
C 19.143654508 -0.902793433 19.985485512
C 18.903154924 1.557139536 20.376218148
C 19.188664231 0.713094459 18.050022089
C 12.423869845 5.259219284 16.206987657
C 12.084910233 2.866783318 16.873792966
C 13.789458653 3.427667364 15.146062388
C 16.673941009 5.333499464 18.770146597
C 16.167837915 5.597267826 16.338619519
H 19.993597210 1.674286739 20.409461496
H 18.562578572 1.369840096 21.397440941
H 18.476757501 2.506596906 20.038976578
H 20.218354330 -0.762558840 20.159719989
H 19.035764801 -1.740302796 19.292095115
```

```
H 18.697094415 -1.189262952 20.943600979
H 20.266612679 0.866531705 18.188872820
H 18.760317935 1.613423804 17.604362771
H 19.061011052 -0.097781012 17.331710954
H 15.704987853 -3.362441437 18.885746524
H 15.541554511 -2.373788324 20.333719154
H 17.145921585 -2.728794056 19.680603915
H 16.218170774 -2.390027827 16.647671649
H 17.769992577 -1.893475660 17.317546088
H 16.736078712 -0.702838173 16.493101484
H 14.085694536 -1.927985765 17.722394349
H 14.405569563 -0.205325261 17.433701444
H 13.931207668 -0.771557047 19.049282068
H 17.358506290 6.189809712 18.722230347
H 17.244469155 4.424626181 18.555557900
H 16.304294535 5.265829365 19.798759711
H 16.976803245 6.338551381 16.339480691
H 15.447652309 5.907091801 15.576415876
H 16.590609449 4.631757001 16.045507970
H 11.601319460 5.099396607 15.497788438
H 13.090588956 6.002051281 15.761938310
H 11.987228734 5.688112954 17.115002476
H 13.004422306 3.308250258 14.388322339
H 14.292014087 2.469359841 15.285131733
H 14.523608692 4.131002578 14.748799563
H 11.377988802 2.721696181 16.047690154
H 11.508095032 3.179101821 17.747796832
H 12.543027519 1.896593736 17.089501233
N 16.435851326 1.859345318 16.344491035
C 16.925851050 1.748719419 15.257393879
O 17.416043708 1.634597412 14.165118621
H 15.431548542 2.497947015 19.468078097
```

2

```
Ni 4.088691762 -4.924073134 -7.136091710
P 5.374892595 -6.282826502 -8.551480335
P 2.671806035 -3.389551863 -6.043118495
Si 7.070919313 -3.849389190 -7.742958723
Si 5.575275006 -2.837735917 -5.354355033
C 1.764009334 -6.683661160 -7.637546695
N 5.588473162 -3.725889798 -6.848454258
C 7.399833509 -2.352490484 -8.865536508
H 7.532779257 -1.432567154 -8.286044445
H 6.561292441 -2.187872364 -9.552485058
H 8.304882007 -2.493675953 -9.469892346
C 8.627866683 -4.103187623 -6.674207101
H 8.839194556 -3.262597910 -6.005846959
H 9.506221200 -4.227572108 -7.320181914
H 8.545607722 -5.002900808 -6.053656445
C 6.956040924 -5.379535792 -8.875445612
H 6.960463667 -5.041119475 -9.914241373
H 7.826062052 -6.029679768 -8.759159813
C 4.729089775 -6.647402885 -10.331281342
C 5.711194008 -7.541031391 -11.114640473
H 5.396679104 -7.587120710 -12.165361111
H 5.721410484 -8.566469350 -10.735390839
H 6.735126872 -7.155156726 -11.095176232
```

C 3.328806609 -7.291116425 -10.341159816  
 H 3.083639369 -7.577017319 -11.371862376  
 H 2.566293870 -6.582826939 -10.015081110  
 H 3.241355343 -8.181169857 -9.720457766  
 C 4.596161254 -5.284726900 -11.051859814  
 H 4.079493319 -5.440062135 -12.006816770  
 H 5.558320585 -4.818791896 -11.280757702  
 H 4.003450517 -4.574660781 -10.465193399  
 C 5.863923407 -7.895789552 -7.618547095  
 C 7.213656231 -8.484923949 -8.075384194  
 H 7.380354117 -9.426902220 -7.538446326  
 H 8.057608941 -7.831310761 -7.836972339  
 H 7.244168705 -8.708426903 -9.144410534  
 C 5.979146514 -7.495158449 -6.131071213  
 H 5.011973522 -7.172003853 -5.739430285  
 H 6.311226796 -8.366095009 -5.551281512  
 C 4.771122206 -8.977344025 -7.741256409  
 H 4.721311949 -9.402894339 -8.747888877  
 H 5.023903093 -9.800006641 -7.060044145  
 H 6.705212528 -6.692264785 -5.970294296  
 H 3.783377519 -8.605895584 -7.459002145  
 C 6.610387767 -1.240677865 -5.367255508  
 H 7.685433671 -1.414015772 -5.475962099  
 H 6.466727575 -0.708260838 -4.418530683  
 H 6.298836611 -0.567590127 -6.173742379  
 C 6.129910652 -3.856388102 -3.849744165  
 H 7.171767287 -4.178709325 -3.956073566  
 H 5.521803590 -4.760984281 -3.734205786  
 H 6.056941117 -3.279885709 -2.918886835  
 C 3.773774914 -2.302421933 -5.032641639  
 H 3.535977168 -2.413304468 -3.972255337  
 H 3.616638349 -1.248438710 -5.280268920  
 C 1.367857205 -4.036604683 -4.781349004  
 C 2.080940920 -5.176464298 -4.018173155  
 H 1.398110820 -5.587744957 -3.264045496  
 H 2.971972482 -4.818844936 -3.489640411  
 H 2.375984158 -5.981605917 -4.694885689  
 C 0.108415008 -4.603000468 -5.466375344  
 H -0.532055699 -5.055230180 -4.698903232  
 H 0.331751284 -5.383988869 -6.192139843  
 H -0.482238532 -3.823612541 -5.956922288  
 C 0.914182437 -2.964362111 -3.767234638  
 H 0.188953844 -3.422680521 -3.083398611  
 H 0.422188805 -2.112557336 -4.241004267  
 H 1.733399336 -2.583682089 -3.152523981  
 C 1.897736675 -2.216420128 -7.349697804  
 C 3.068707306 -1.486011511 -8.045499307  
 H 2.680020642 -0.943071613 -8.916041263  
 H 3.839558707 -2.183678231 -8.383251349  
 H 3.548269843 -0.751350291 -7.392479985  
 C 1.160738998 -3.047512418 -8.418742209  
 H 0.772149385 -2.376334391 -9.195161723  
 H 0.315003999 -3.607414706 -8.013644873  
 H 1.838943420 -3.757421262 -8.901948201  
 C 0.940766725 -1.171090596 -6.748720545  
 H 0.652748590 -0.454553697 -7.528840553  
 H 1.407018241 -0.600091805 -5.939205633  
 H 0.021082954 -1.622016993 -6.366711771  
 O 2.852812778 -6.345514049 -7.008257994

O 1.205651517 -7.767629164 -7.539940432  
 H 1.339254962 -5.895415278 -8.296240767

**I**

Ni 4.026336755 -4.921999042 -7.168787620  
 P 5.301515390 -6.320949004 -8.528415712  
 P 2.711846099 -3.365120762 -6.027136564  
 Si 7.012911909 -3.849226672 -7.807679631  
 Si 5.659281290 -3.006608894 -5.249293098  
 O 1.630890415 -5.893226002 -8.303641713  
 N 5.638273727 -3.818671534 -6.770321345  
 C 7.281168379 -2.261062111 -8.821289172  
 H 7.508107394 -1.404301498 -8.177197207  
 H 6.387501619 -2.005461546 -9.402678275  
 H 8.116039622 -2.371700602 -9.525225656  
 C 8.680192696 -4.211345885 -6.953668542  
 H 8.968166912 -3.414401969 -6.259026846  
 H 9.483929153 -4.292870476 -7.696633395  
 H 8.661549407 -5.146384621 -6.382708354  
 C 6.690684458 -5.234516901 -9.082634688  
 H 6.354996133 -4.740462515 -10.000285482  
 H 7.586833433 -5.802913719 -9.346154372  
 C 4.599498835 -6.966782946 -10.209294784  
 C 5.726756159 -7.484476050 -11.125110233  
 H 5.299162352 -7.774236179 -12.093544398  
 H 6.218259118 -8.370022821 -10.710566341  
 H 6.491689958 -6.727621042 -11.317280628  
 C 3.532220649 -8.074980385 -10.079255391  
 H 3.026379594 -8.181625346 -11.047343102  
 H 2.770567332 -7.842116170 -9.336583623  
 H 3.964133605 -9.045326147 -9.834674447  
 C 3.915862990 -5.744922024 -10.868939744  
 H 3.545291368 -6.038085671 -11.859211443  
 H 4.594799765 -4.900305342 -11.018130184  
 H 3.064228985 -5.406517315 -10.274353777  
 C 6.118591917 -7.730539433 -7.491506364  
 C 7.570740437 -8.014973774 -7.921546930  
 H 7.957407038 -8.851741561 -7.325982814  
 H 8.230260257 -7.161156049 -7.746329351  
 H 7.651839934 -8.300038988 -8.975051829  
 C 6.103716007 -7.251757969 -6.023539936  
 H 5.076812894 -7.165054197 -5.657653110  
 H 6.628591904 -7.990723633 -5.403973256  
 C 5.308726795 -9.040165707 -7.560193305  
 H 5.424597200 -9.548919061 -8.520479327  
 H 5.689510495 -9.721564740 -6.788652816  
 H 6.591200338 -6.284530237 -5.891612170  
 H 4.247158085 -8.876656330 -7.361251179  
 C 6.708694380 -1.417258291 -5.184806070  
 H 7.778028748 -1.605948426 -5.328700486  
 H 6.597781542 -0.933709259 -4.206166597  
 H 6.396081154 -0.694984592 -5.947472526  
 C 6.221914933 -4.089392853 -3.789877014  
 H 7.253359074 -4.437298814 -3.920016927  
 H 5.589142960 -4.979184301 -3.689577373  
 H 6.178361364 -3.537826549 -2.841810425  
 C 3.857054649 -2.496407506 -4.860765402  
 H 3.616799896 -2.803503634 -3.839414458

|   |              |              |              |   |             |              |              |
|---|--------------|--------------|--------------|---|-------------|--------------|--------------|
| H | 3.710465036  | -1.412106853 | -4.904213829 | H | 3.139956140 | -0.658315423 | -8.629955319 |
| C | 1.275265014  | -3.919630708 | -4.867124192 | H | 4.135043620 | -2.064871888 | -8.182496146 |
| C | 1.836881287  | -5.115354603 | -4.061116626 | H | 3.929553237 | -0.724466982 | -7.052128302 |
| H | 1.066581168  | -5.466612884 | -3.362740860 | C | 1.397737429 | -2.648250238 | -8.440963208 |
| H | 2.708368096  | -4.830245817 | -3.461207243 | H | 1.126631205 | -1.866036269 | -9.161899804 |
| H | 2.120755536  | -5.951139901 | -4.702498815 | H | 0.479487909 | -3.154357136 | -8.135908257 |
| C | 0.035174499  | -4.374254435 | -5.661250320 | H | 2.021499908 | -3.384468395 | -8.951701632 |
| H | -0.677580692 | -4.844253854 | -4.972193117 | C | 1.254357033 | -0.917385341 | -6.619420199 |
| H | 0.277423307  | -5.099299493 | -6.438507158 | H | 1.113868153 | -0.102721965 | -7.341738033 |
| H | -0.478265528 | -3.529817826 | -6.131206784 | H | 1.704006962 | -0.480835675 | -5.721790358 |
| C | 0.832444083  | -2.833118552 | -3.862736808 | H | 0.261223354 | -1.293972592 | -6.361221019 |
| H | 0.082151477  | -3.270209797 | -3.191763742 | C | 2.597939382 | -6.140439537 | -7.345865552 |
| H | 0.373142201  | -1.969339365 | -4.345206524 | O | 2.475854525 | -7.153004320 | -6.667479962 |
| H | 1.652716366  | -2.473948022 | -3.236454882 | H | 1.006863502 | -6.643435708 | -8.242519592 |
| C | 2.143145502  | -2.001000606 | -7.257357907 |   |             |              |              |
| C | 3.419997126  | -1.329421668 | -7.808109245 |   |             |              |              |

## Experimental

**General Considerations.** All manipulations were performed using standard Schlenk techniques or in an argon-filled glovebox unless otherwise noted. Pentane and THF were purified using an Innovative Technologies solvent purification system Pure Solv 400-6-MD. Benzene D-6 was dried under  $\text{Ph}_2\text{CO}/\text{Na}$ , vacuum transferred and stored in the glovebox under argon.  $\text{CO}_2$  was used as received from commercial vendors.  $[(^t\text{Bu}_2\text{PCH}_2\text{SiMe}_2)_2\text{N}]\text{NiH}$  and  $(\text{PNP})\text{NiCl}$  were prepared following the published synthesis.<sup>1</sup> NMR chemical shifts are reported in ppm relative to protio impurities in the deuterio solvents. Coupling constants are given in Hz.  $^{31}\text{P}$  NMR spectra are referenced to external standards of  $\text{H}_3\text{PO}_4$ . NMR spectra were recorded with a Varian Unity INOVA instrument (400 MHz  $^1\text{H}$ ; 162 MHz  $^{31}\text{P}$ ). Infrared spectra were recorded on a Nicolet 510P FT-IR spectrometer. Mass spectra were acquired on a MAT-95-XP spectrometer (Thermo Electron Corp, Bremen, Germany). “PNP” is  $\text{N}(\text{SiMe}_2\text{CH}_2\text{PBu}_2^t)_2$ .

### $[(^t\text{Bu}_2\text{PCH}_2\text{SiMe}_2)_2\text{NH}]\text{NiH}(\text{BAR}^f_4)$

A solution of 20 mg (0.039 mmol) of  $(\text{PNP})\text{NiCl}$  and 35 mg (0.039 mmol) of  $\text{NaB}[3,5-(\text{CF}_3)_2\text{C}_6\text{H}_3]_4$  in 0.5 mL  $\text{CD}_2\text{Cl}_2$  was agitated end-over-end for 1 h. The solution was freeze-pump-thaw degassed and 760 mmHg of  $\text{H}_2$  was added on a vacuum line. In time of mixing the solution had changed color from red to yellow. NMR analysis showed complete conversion into the new  $(\text{PNHP})\text{NiH}(\text{BAR}^f_4)$ .  $^1\text{H}$  NMR ( $\text{CD}_2\text{Cl}_2$ ): 7.76 (br.s, Ar-o, 8 H), 7.59 (br.s, Ar-p, 4 H), 1.33 (t,  $\text{J}_{\text{P-H}}$ , 7.0 Hz,  $^t\text{Bu}$ , 18H), 1.32 (t,  $\text{J}_{\text{P-H}}$ , 7.0 Hz,  $^t\text{Bu}$ , 18H), 1.23-1.26 (m,  $\text{CH}_2$ , 4H), 0.48 (s, SiMe, 6H), 0.39 (s, SiMe, 6H), -22.06 (t,  $\text{J}_{\text{P-H}}$ , 66.1 Hz, Ni-H, 1H). The N-H proton was not located.  $^{31}\text{P}\{^1\text{H}\}$  NMR ( $\text{CD}_2\text{Cl}_2$ ): 63.2.  $^{19}\text{F}$  NMR ( $\text{CD}_2\text{Cl}_2$ ): -63.2 (s).

**[(<sup>t</sup>Bu<sub>2</sub>PCH<sub>2</sub>SiMe<sub>2</sub>)<sub>2</sub>N]NiH**

- a) **From (PNHP)NiHOTf and Et<sub>3</sub>N in D<sub>8</sub>THF.** 15 mg (0.023mmol) of {(<sup>t</sup>Bu<sub>2</sub>PCH<sub>2</sub>SiMe<sub>2</sub>)<sub>2</sub>NH]NiH(OTf)} was dissolved in 0.5ml of deuterated THF. To this solution a 10-fold excess (3.2μL) of Et<sub>3</sub>N was added. The NMR of the resulting yellow solution showed 90% conversion to (PNP)NiH. **<sup>1</sup>H NMR (D<sub>8</sub>THF):** 1.30 (t, J<sub>P-H</sub>, 6.3 Hz, <sup>t</sup>Bu, 36H), 0.95 (t, J<sub>P-H</sub>, 6.6 Hz, CH<sub>2</sub>, 4H), 0.61 (s, SiMe, 12H), -21.30 (t, J<sub>P-H</sub>, 66 Hz, NiH, 1H). **<sup>31</sup>P{<sup>1</sup>H} NMR (D<sub>8</sub>THF):** 73.2 .
- b) **From [(PNHP)Ni(H)]BAr<sup>f</sup><sub>4</sub> and LiN<sup>i</sup>Pr<sub>2</sub> in THF.** A solution of (PNHP)NiH(BAr<sup>f</sup><sub>4</sub>) in CD<sub>2</sub>Cl<sub>2</sub> obtained from 20 mg of (PNP)NiCl, 35 mg of NaB[3,5-(CF<sub>3</sub>)<sub>2</sub>C<sub>6</sub>H<sub>3</sub>]<sub>4</sub> and 1 atm H<sub>2</sub> (as above) was dried in vacuum and dissolved in 3 mL of THF. 4.2 mg (0.039 mmol) of LiN<sup>i</sup>Pr<sub>2</sub> was added. After 10 minutes of stirring all volatiles were removed in vacuum. The residue was extract with 2 x 10 mL of pentane and filtered through the glass filter. Pentane was removed in vacuum to give yellow solid. NMR analysis showed complete conversion into (PNP)Ni-H. **<sup>1</sup>H NMR (C<sub>6</sub>D<sub>6</sub>):** 1.23 (t, J<sub>P-H</sub>, 6.4 Hz, <sup>t</sup>Bu, 36H), 0.82 (t, J<sub>P-H</sub>, 4.8 Hz, CH<sub>2</sub>, 4H), 0.40 (s, SiMe, 12H), -21.19 (t, J<sub>P-H</sub>, 68 Hz, NiH, 1H). **<sup>31</sup>P{<sup>1</sup>H} NMR (C<sub>6</sub>D<sub>6</sub>):** 73.8 .

**Reaction of (PNP)NiH with CO<sub>2</sub>.** 16.2 mg (0.032 mmol) of (PNP)NiH was dissolved in 0.5mL of benzene in a J-Young NMR tube leaving a yellow solution. The solution was freeze-pump-thawed once followed by the addition of one atmosphere of CO<sub>2</sub> to the frozen solution. The solution was thawed to room temperature and shaken vigorously. After four days of end-over-end agitation, full conversion of the starting material to the new single product, (POP)Ni(H)(NCO), was observed. From a pentane solution, crystals were grown at -40 °C suitable for X-ray diffraction analysis. **<sup>1</sup>H NMR (25 °C C<sub>6</sub>D<sub>6</sub>):** 1.26 (t, J<sub>P-H</sub>, 6.6, <sup>t</sup>Bu, 36 H), 0.62 (m, CH<sub>2</sub>, 4 H), 0.18 (s, SiMe, 12 H), -25.52 (t, J<sub>P-H</sub>, 78.1, NiH, 1H). **<sup>31</sup>P{<sup>1</sup>H} NMR (25 °C C<sub>6</sub>D<sub>6</sub>):** 41.6. **MS (CI) THF:** 509.2423 C<sub>22</sub>H<sub>53</sub>P<sub>2</sub>Si<sub>2</sub>NiO [M-NCO]<sup>+</sup>; the loss of the cyanate ligand in forming a positive ion speaks for “NCO” connectivity in the molecule, and thus against the molecule as still containing two C=O bonds (i.e. not containing intact CO<sub>2</sub>). **IR (KBr):** 2224 cm<sup>-1</sup> (N=C=O). This molecule is decomposed within minutes by CH<sub>2</sub>Cl<sub>2</sub>, with color change to orange and production of diverse products, including paramagnetic species.

1. Ingleson, Michael J.; Fullmer, Benjamin C.; Buschhorn, Drew T.; Fan, Hongjun; Huffman, John C.; Caulton, Kenneth G., *Inorg. Chem.*, **2008**, *47*(2), 407-409.

**Crystal Structure Determination.** An orange crystal (approximate dimensions 0.21 × 0.13 × 0.13 mm<sup>3</sup>) was placed onto the tip of a 0.1 mm diameter glass capillary and mounted on a Bruker APEX II Kappa Duo diffractometer equipped with an APEX II detector at 150(2) K.

**Data collection**



The data collection was carried out using Mo  $K_{\alpha}$  radiation (graphite monochromator) with a frame time of 30 seconds and a detector distance of 5.0 cm. A collection strategy was calculated and complete data to a resolution of 0.77 Å with a redundancy of 4 were collected. Four major sections of frames were collected with 0.50°  $\omega$  and  $\phi$  scans. Data to a resolution of 0.77 Å were considered in the reduction. Final cell constants were calculated from the xyz centroids of 9978 strong reflections from the actual data collection after integration (SAINT).<sup>1</sup> The intensity data were corrected for absorption (SADABS).<sup>2</sup>

### Structure solution and refinement

The space group P2(1)/c was determined based on intensity statistics and systematic absences. The structure was solved using SIR-2004<sup>3</sup> and refined with SHELXL-97.<sup>4</sup> A direct-methods solution was calculated, which provided most non-hydrogen atoms from the E-map. Full-matrix least squares / difference Fourier cycles were performed, which located the remaining non-hydrogen atoms. All non-hydrogen atoms were refined with anisotropic displacement parameters. The hydrogen atoms were placed in ideal positions and refined as riding atoms with relative isotropic displacement parameters, with the exception of H1ni, which was found in the difference map and only its thermal parameter was refined. The final full matrix least squares refinement converged to R1 = 0.0243 and wR2 = 0.0671 ( $F^2$ , all data). The remaining electron density is minuscule and located on bonds.

1 SAINT, Bruker Analytical X-Ray Systems, Madison, WI, current version.

2 An empirical correction for absorption anisotropy.

R. Blessing, *Acta Cryst.* A51, 33 - 38 (1995).

3 Sir2004, A Program for Automatic Solution and Refinement of Crystal Structures.

M. C. Burla, R. Caliendo, M. Carnalli, B. Carrozzini, G. L. Cascarano, L. De Caro, C. Giacovazzo, G. Polidori, R. Sagna. Vers. 1.0 (2004).

4 A short history of *SHELX*.

G. M. Sheldrick, *Acta Cryst.* A64, 112 - 122 (2008).
